# Supplementary material
Source: Royal Society of Chemistry journal article supplement (doi:10.1039/d6fo00474a)
Supplement: d6fo00474a1.pdf [file d6fo00474a1.pdf]

## Supplementary Information

**Table S1.** RT-qPCR amplified primers

**Table S2.** Effect of 2'-FL and BB536 on body weight, food intake and water intake in constipated mice

Fig. S1 The contents of DA and 5-HT in the prefrontal and hippocampus (n=3). (A) DA in prefrontal cortex. (B) DA in hippocampus. (C) 5-HT in prefrontal cortex. (D) 5-HT in hippocampus.

Fig. S2 KEGG pathway statistics were predicted according to PICRUSt analysis.

**Table S1. RT-qPCR amplified primers**

| Name            | Forward primer (5'-3') | Reverse primer (5'-3') |
|-----------------|------------------------|------------------------|
| c-Kit           | GGCCTCACGAGTTCTATTTACG | GGGGAGAGATTTCCCATCACAC |
| SCF             | AGCTTGACTACTCTTCTGGACA | TGGCCTCTTCGGAGATTCTTTT |
| PSD-95          | TCCGGGAGGTGACCCATTC    | TTTCCGGCGCATGACGTAG    |
| TNF- $\alpha$   | CCCTCACACTCACAAACCAC   | ACAAGGTACAACCCATCGGC   |
| SNAP-25         | ATCCGCAGGGTAACAAATGATG | CGGAGGTTTCCGATGATGC    |
| AQP9            | GGCTCTTTATGCGACTTTTGGT | CAAAGGCCATGAGTCCGTCA   |
| $\beta$ -action | GATATCGCTGCGCTGGTCG    | CATTCCCACCATCACACCCT   |

**Table S2. Effect of 2'-FL and BB536 on body weight, food intake and water intake in constipated mice**

| Group       | Category                      |                              |                              |
|-------------|-------------------------------|------------------------------|------------------------------|
|             | Body weight (g)               | Food intake (g/d)            | Water intake (mL/d)          |
| NC          | 26.65 $\pm$ 1.32 <sup>a</sup> | 4.34 $\pm$ 0.27 <sup>a</sup> | 5.74 $\pm$ 0.66 <sup>a</sup> |
| MC          | 24.75 $\pm$ 0.90 <sup>a</sup> | 4.06 $\pm$ 0.40 <sup>a</sup> | 6.25 $\pm$ 0.32 <sup>a</sup> |
| PC          | 25.71 $\pm$ 1.00 <sup>a</sup> | 3.98 $\pm$ 0.22 <sup>a</sup> | 6.02 $\pm$ 0.38 <sup>a</sup> |
| 2'-FL       | 25.98 $\pm$ 0.81 <sup>a</sup> | 3.99 $\pm$ 0.27 <sup>a</sup> | 5.93 $\pm$ 0.44 <sup>a</sup> |
| BB536       | 25.38 $\pm$ 0.91 <sup>a</sup> | 4.03 $\pm$ 0.30 <sup>a</sup> | 6.35 $\pm$ 0.36 <sup>a</sup> |
| 2'-FL+BB536 | 25.11 $\pm$ 1.09 <sup>a</sup> | 4.12 $\pm$ 0.32 <sup>a</sup> | 6.16 $\pm$ 0.51 <sup>a</sup> |

Note: Data are expressed as mean  $\pm$  standard deviation (n=7). Different letters indicate statistically significant differences ( $P < 0.05$ ).

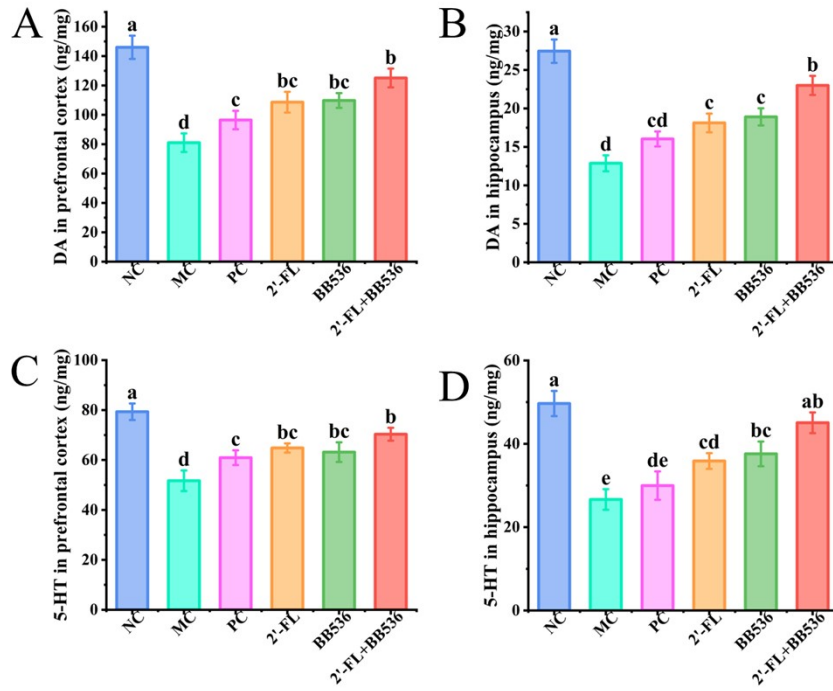

Fig. S1

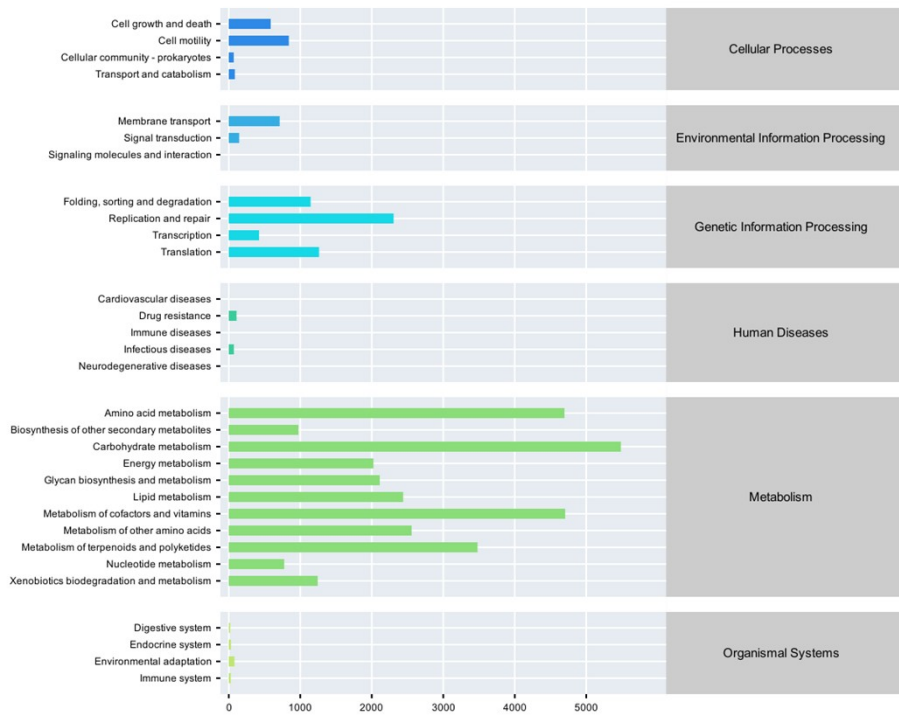

Fig. S2
